# Supplementary material
Source: Springer Nature journal article supplement (https://www.springermedizin.de/resource/supplementary/12906_2001_9_MOESM8_ESM.pdf/9519328)

- ◆ CaCl<sub>2</sub>-Ca d Sulph-30
- CaCl<sub>2</sub>-Alc-30
- ▲ CaCl<sub>2</sub>-Ca d Sulph-200
- + CaCl<sub>2</sub>-Alc-200

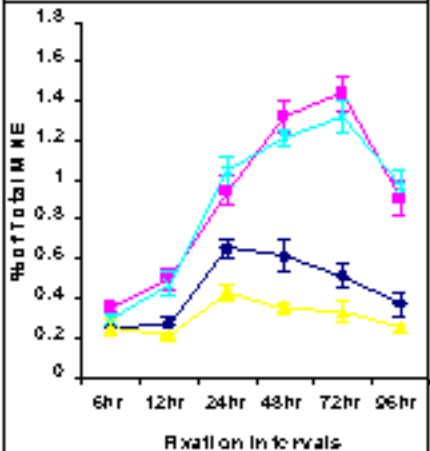

Supplement: MOESM8 [file 9519328]
